# Supplementary material
Source: Royal Society of Chemistry journal article supplement (doi:10.1039/d6ta00943c)
Supplement: d6ta00943c1.pdf [file d6ta00943c1.pdf]

1  
2  
3  
4  
5  
6  
7  
8  
9  
10  
11  
12  
13  
14  
15  
16  
17  
18  
19  
20  
21  
22

## Supporting Information

### **Orbital Modulation and Coupled Redox Cycling in Fe–Mn Dual-Atom Catalysts for Efficient Fenton-like Water Purification**

Jianing Xu,<sup>a</sup> Yangyang Wang,<sup>\*b</sup> Qianqian Chen,<sup>c</sup> Heng Zheng<sup>\*c</sup>

<sup>a</sup>*Department of Joint Osteopathy, Liuzhou Worker's Hospital, Liuzhou, 545005, China;*

<sup>b</sup>*College of Water Resources and Architectural Engineering, Tarim University, Alar, 843300, China;*

<sup>c</sup>*School of Medicine, Guangxi University of Science and Technology, Guangxi, 545006, China.*

<sup>\*</sup>Corresponding authors.

Prof. & Dr: Yangyang Wang

College of Water Resources and Architectural Engineering, Tarim University

E-mail: wangyangyang0317@163.com (Y. Wang)

Prof. & Dr. Heng Zheng

School of Medicine, Guangxi University of Science and Technology

E-mail: zy101801@163.com (H. Zheng)

23 **Texts caption**

24 **Text S1.** Synthesis Procedure for the PAA Stock Solution.

25 **Text S2.** Analytical Methods for PAA Quantification.

26 **Text S3.** Electrochemical measurements.

27 **Text S4.** Detection method of SMX intermediate products.

28 **Text S5.** Theoretical calculation.

29 **Text S6.** Calculation of metal-normalized rate constant.

30 **Text S7.** Analysis of  $^1\text{O}_2$  Trapping by DMA.

31 **Text S8.** Detection of  $^1\text{O}_2$  Using the SOSG Probe.

32 **Text S9.** The recovery method of catalysts in the cycling experiments.

33

34 **Text S1.** Synthesis Procedure for the PAA Stock Solution.

35 The peracetic acid (PAA) stock solution was synthesized by reacting acetic acid  
36 ( $\text{CH}_3\text{COOH}$ ) with hydrogen peroxide ( $\text{H}_2\text{O}_2$ ), using sulfuric acid ( $\text{H}_2\text{SO}_4$ ) as a catalyst.  
37 In a typical procedure, 60 mL of  $\text{CH}_3\text{COOH}$  was mixed with 40 mL of  $\text{H}_2\text{O}_2$ ,  
38 followed by the dropwise addition of 1.67 mL of  $\text{H}_2\text{SO}_4$  under constant stirring. The  
39 resulting mixture was aged and subsequently stored at 4 °C for future use.

40

41 **Text S2.** Analytical Methods for PAA Quantification.

42 The concentration of the PAA stock solution was determined by a two-step  
43 iodometric titration. In the first step, hydrogen peroxide ( $\text{H}_2\text{O}_2$ ) present in the solution  
44 was quenched using potassium permanganate. This was followed by the titration of  
45 PAA with potassium iodide under acidic conditions. For monitoring residual PAA  
46 concentrations during reaction processes, the N,N'-diethyl-p-phenylenediamine (DPD)  
47 colorimetric method was applied. The assay was performed by introducing excess KI  
48 ( $20 \text{ g L}^{-1}$ ), DPD ( $1.1 \text{ g L}^{-1}$ ), and phosphate buffer (0.5 M, pH 6.5), with the resulting  
49 absorbance measured at 515 nm.

50

51 **Text S3.** Electrochemical measurements.

52 Electrochemical measurements were conducted with a CHI 660E electrochemical  
53 workstation in a standard three-electrode configuration. A Pt wire, a saturated calomel  
54 electrode (SCE), and a glassy carbon electrode served as the counter, reference, and  
55 working electrodes, respectively. A catalyst ink was prepared by dispersing 5 mg of  
56 the catalyst in a mixture of 980  $\mu\text{L}$  ethanol and 20  $\mu\text{L}$  of 5% Nafion solution under  
57 ultrasonication for 40 min to achieve a homogeneous slurry. Then, 20  $\mu\text{L}$  of the  
58 resulting ink was drop-cast onto the conductive circular surface of the glassy carbon  
59 electrode. After drying completely, the working electrode was immersed in a 0.5 M  
60  $\text{Na}_2\text{SO}_4$  electrolyte for electrochemical testing.

61

62 **Text S4.** Detection method of SMX intermediate products.

63 The intermediate products of SMX in the Fe-Mn/N-C/PAA system were

64 characterized using ultra-high performance liquid chromatography coupled with mass  
65 spectrometry (UPLC–MS) under positive electrospray ionization (ESI+) mode.  
66 Before analysis, the mobile phase was subjected to sonication to eliminate dissolved  
67 gases. Chromatographic separation was achieved using a C18 HPLC capillary column  
68 (100 mm × 2.1 mm i.d., 5 μm; Thermo, USA). Mobile phase A consisted of a mixture  
69 of methanol/water mixture (v/v = 70/30), while mobile phase B contained an aqueous  
70 solution of 0.1% formic acid and  $5 \times 10^{-3}$  mol L<sup>-1</sup> ammonium formate. The flow rate  
71 was set at 1 mL min<sup>-1</sup>, with an injection volume of 20 μL. Detection was performed at  
72 an excitation wavelength of 264 nm.

73

74 **Text S5.** Theoretical calculation.

75 First-principles calculations based on spin-polarized density functional theory (DFT)  
76 were performed using the Vienna ab initio simulation package (VASP). The  
77 projector-augmented wave (PAW) method was employed together with the Perdew–  
78 Burke–Ernzerhof (PBE) generalized gradient approximation (GGA) for the  
79 exchange–correlation functional. A plane-wave cutoff energy of 400 eV was used for  
80 all computations. Structural relaxations were considered complete when the total  
81 energy change was less than 0.1 meV and the forces on all atoms were below 0.01 eV  
82 Å<sup>-1</sup>. A 6 × 6 graphene supercell (14.807 × 14.807 Å) with a 12 Å vacuum layer was  
83 constructed as the base model. Single-atom Fe-N<sub>4</sub> and Mn-N<sub>4</sub> configurations, as well  
84 as three distinct types of Fe/Mn co-doped structures, were modeled on this substrate.  
85 All calculations utilized a 4 × 4 × 1 k-point mesh for Brillouin zone sampling.

86 The interaction between the catalyst and peracetic acid (PAA) was quantified by  
87 calculating the adsorption energy ( $E_{\text{ads}}$ ). Specifically, the  $E_{\text{ads}}$  of PAA on the active  
88 site was computed using the equation:

$$89 \quad E_{\text{ads}} = E_{(\text{catalyst/PAA})} - E_{\text{catalyst}} - E_{\text{PAA}}$$

90 where  $E_{(\text{catalyst/PAA})}$  is the total energy of the optimized catalyst-PAA complex,  
91  $E_{\text{catalyst}}$  is the energy of the isolated catalyst model, and  $E_{\text{PAA}}$  is the energy of a single  
92 PAA molecule in the gas phase. A more negative  $E_{\text{ads}}$  value corresponds to a more  
93 favorable and stronger adsorption configuration, which is crucial for the subsequent

94 activation step.

95 To gain deeper insight into the catalytic mechanism, we investigated the reaction  
96 pathway for PAA activation. The Gibbs free energy change ( $\Delta G$ ) for each elementary  
97 reaction step was determined by:

$$98 \quad \Delta G = \Delta E + \Delta ZPE - T\Delta S$$

99 where  $\Delta E$  is the reaction energy directly derived from DFT calculations,  $\Delta ZPE$  is  
100 the change in zero-point energy,  $T$  is the temperature (set to 298.15 K), and  $\Delta S$  is the  
101 change in entropy. The Gibbs free energy profile was constructed to identify the rate-  
102 determining step and elucidate the catalytic efficiency of different active sites.

103

104 **Text S6.** Calculation of metal-normalized rate constant.

105 To compare the intrinsic catalytic activity of different catalysts, the observed  
106 pseudo-first-order rate constant was normalized by the total molar concentration of  
107 metal species in the reaction system:

$$108 \quad k_{\text{norm}} = k_{\text{obs}}/C_{\text{metal}}$$

109 where  $k_{\text{obs}}$  is the apparent first-order rate constant ( $\text{min}^{-1}$ ), and  $C_{\text{metal}}$  is the total  
110 molar concentration of metal species ( $\text{mol L}^{-1}$ ) calculated from the catalyst dosage  
111 and the ICP-measured metal loading.

112 For the Fe–Mn/N–C catalyst, the total metal concentration was calculated as:

$$113 \quad C_{\text{metal}} = C_{\text{Fe}} + C_{\text{Mn}}$$

114 with

$$115 \quad C_{\text{Fe}} = C_{\text{cat}} \times w_{\text{Fe}}/M_{\text{Fe}}, C_{\text{Mn}} = C_{\text{cat}} \times w_{\text{Mn}}/M_{\text{Mn}}$$

116 where  $C_{\text{cat}}$  is the catalyst dosage ( $\text{g L}^{-1}$ ),  $w_{\text{Fe}}$  and  $w_{\text{Mn}}$  are the ICP-determined mass  
117 fractions of Fe and Mn, and  $M_{\text{Fe}}$  and  $M_{\text{Mn}}$  are the molar masses of Fe and Mn,  
118 respectively.

119

120 **Text S7.** Analysis of  $^1\text{O}_2$  Trapping by DMA.

121 9,10-Dimethylanthracene (DMA) was employed as a selective molecular probe for  
122  $^1\text{O}_2$ , undergoing a specific reaction to form its endoperoxide derivative (DMA– $\text{O}_2$ ).

123 The formation of DMA–O<sub>2</sub> was analyzed using mass spectrometry with atmospheric  
124 pressure chemical ionization in positive ion mode (APCI+), acquiring signals across a  
125 mass range of 100–450 m/z. Retention times for DMA and DMA–O<sub>2</sub> were determined  
126 from their respective MS signals. The conversion extent from DMA to DMA–O<sub>2</sub> was  
127 quantified based on absorbance measurements at 258 nm, using the molar absorption  
128 coefficients  $\epsilon_{\text{DMA}, 258 \text{ nm}}$  and  $\epsilon_{\text{DMA-O}_2, 258 \text{ nm}}$ . Experimentally, 1 mL of a  
129 DMA solution (3.2  $\mu\text{mol L}^{-1}$ ) was added to 1.0 mL of the reaction mixture.  
130 Fluorescence detection was carried out with excitation at 380 nm and emission  
131 monitored at 425 nm, providing an additional spectroscopic signal for monitoring the  
132 reaction.

133

134 **Text S8.** Detection of <sup>1</sup>O<sub>2</sub> Using the SOSG Probe.

135 <sup>1</sup>O<sub>2</sub> generation was monitored using the Singlet Oxygen Sensor Green (SOSG)  
136 fluorescent probe. Prior to each experiment, a 500  $\mu\text{M}$  SOSG stock solution was  
137 prepared in deoxygenated methanol. For the reaction, 1 mg of catalyst and 200  $\mu\text{L}$  of  
138 the SOSG stock solution were added to 10 mL of ultrapure water. The reaction was  
139 initiated by introducing 20  $\mu\text{L}$  of 100 mM PAA.

140 At designated time intervals, 500  $\mu\text{L}$  aliquots were collected, diluted to 4 mL with  
141 ultrapure water, and immediately filtered through a 0.22  $\mu\text{m}$  PTFE syringe filter.  
142 Fluorescence measurements were conducted on a HITACHI F-4600  
143 spectrofluorometer with an excitation wavelength of 488 nm, and the emission  
144 spectrum was recorded from 500 to 590 nm.

145

146 **Text S9.** The recovery method of catalysts in the cycling experiments.

147 After the 20-min reaction, the catalysts were separated from the solution by suction  
148 filtration. They were subsequently washed with deionized water several times and  
149 transferred into a new solution via brief sonication (2–3 s) to detach them from the  
150 filter paper.

151 **Figures caption**

152 **Fig. S1** Atomic structure model of the Fe–Mn/N–C dual-atom catalyst.

153 **Fig. S2 a-c** Bader charge analysis of Fe/N–C, Mn/N–C, and Fe–Mn/N–C.

154 **Fig. S3** PAA adsorption energies on Fe/N–C, Mn/N–C, and Fe–Mn/N–C.

155 **Fig. S4** The O–O bond length of adsorbed PAA on Fe/N–C, Mn/N–C, and Fe–Mn/N–  
156 C.

157 **Fig. S5** PDOS of Mn/N–C and Fe–Mn/N–C.

158 **Fig. S6 a-f** SEM and TEM images of Fe/N–C, Mn/N–C and Fe–Mn/N–C.

159 **Fig. S7 a-c** Full survey, High-resolution C 1s, and O 1s XPS spectra of Fe/N–C,  
160 Mn/N–C, and Fe–Mn/N–C.

161 **Fig. S8 a-b** Influence of Fe–Mn/N–C dosage and PAA concentration.

162 **Fig. S9** SMX removal efficiency in only-PAA system.

163 **Fig. S10** Kinetic curves in different reaction systems.

164 **Fig. S11** TOC removal of different reaction systems.

165 **Fig. S12** SMX degradation efficiency in Fe–Mn/N–C/PAA/D<sub>2</sub>O system.

166 **Fig. S13** Metal leaching during cyclic operation of the Fe–Mn/N–C/PAA system.

167 **Fig. S14** Metal leaching under different pH conditions in the Fe–Mn/N–C/PAA  
168 system.

169 **Fig. S15** Effect of humic acid on SMX degradation in the Fe–Mn/N–C/PAA system.

170

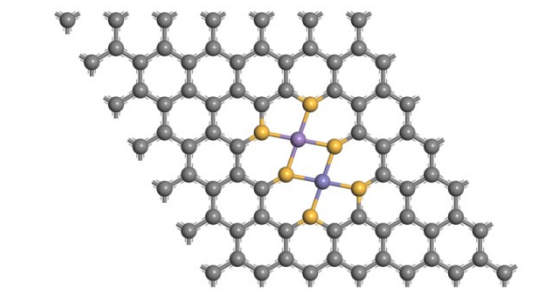

171

172 **Fig. S1** Atomic structure model of the Fe-Mn/N-C dual-atom catalyst.

173

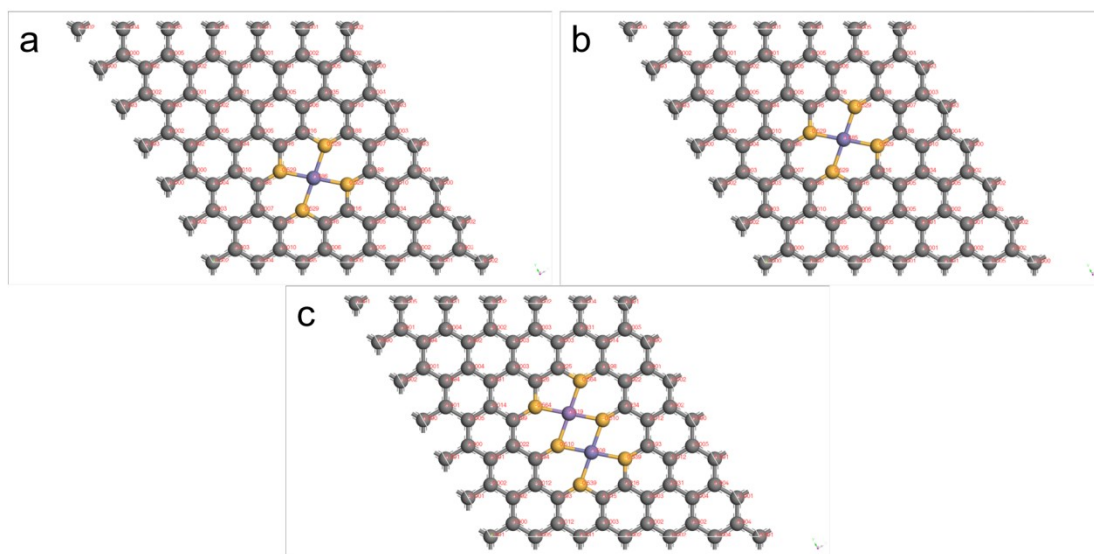

174

175 **Fig. S2 a-c** Bader charge analysis of Fe/N-C, Mn/N-C, and Fe-Mn/N-C.

176

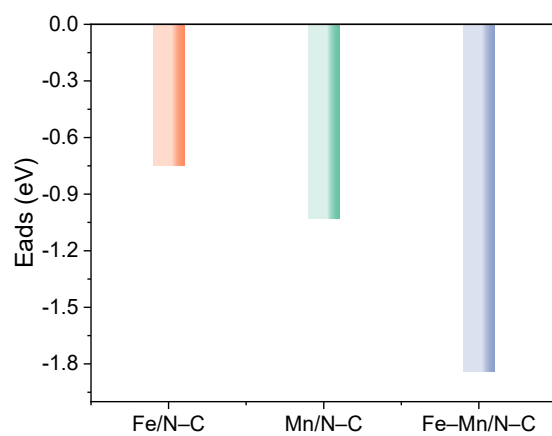

177

178 **Fig. S3** PAA adsorption energies on Fe/N-C, Mn/N-C, and Fe-Mn/N-C.

179

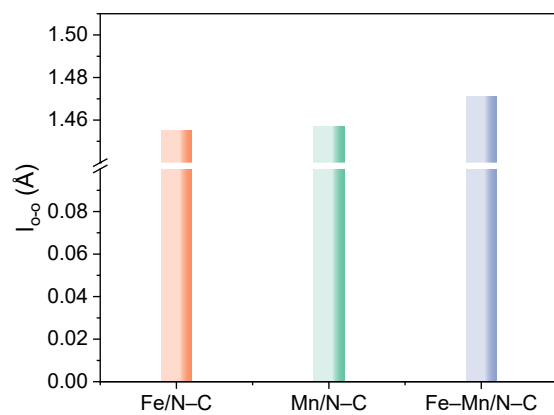

180

181 **Fig. S4** The O–O bond length of adsorbed PAA on Fe/N–C, Mn/N–C, and Fe–Mn/N–  
 182 C.

183

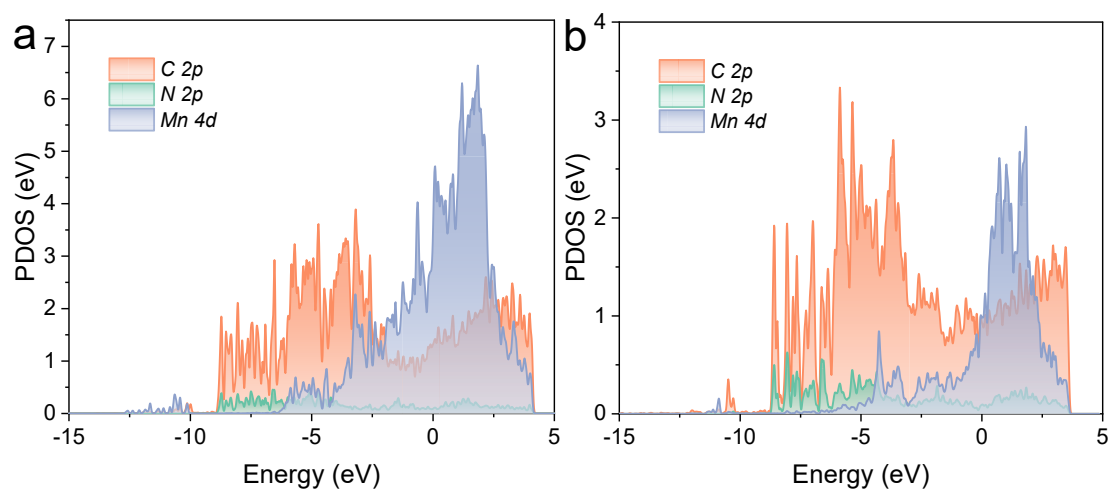

184

185 **Fig. S5** PDOS of Mn/N–C and Fe–Mn/N–C.

186

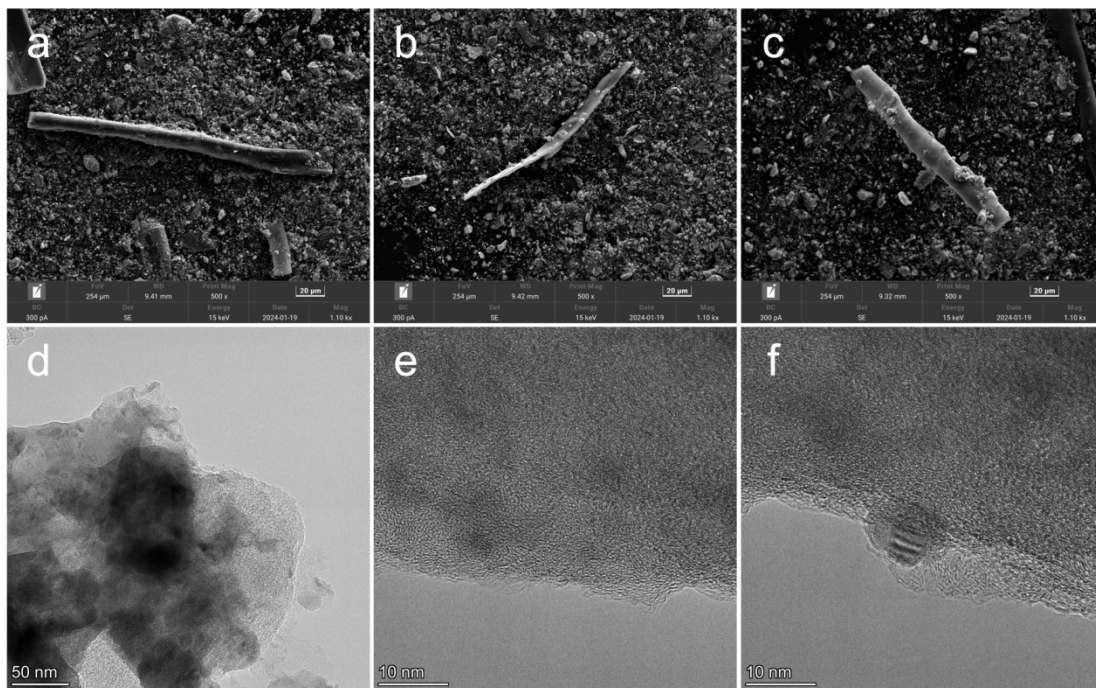

187

188 **Fig. S6 a-f** SEM and TEM images of Fe/N-C, Mn/N-C and Fe-Mn/N-C.

189

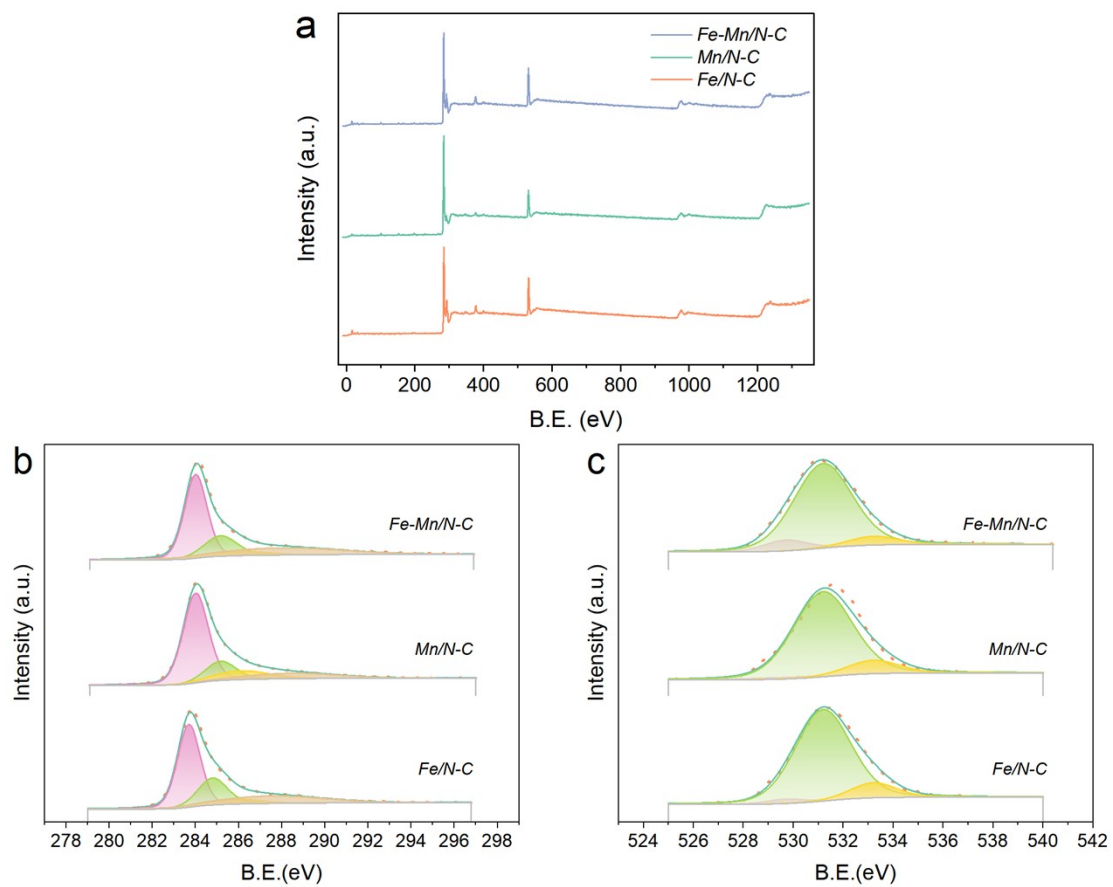

190

191 **Fig. S7 a-c** Full survey, High-resolution C 1s, and O 1s XPS spectra of Fe/N-C,

192 Mn/N-C, and Fe-Mn/N-C.

193

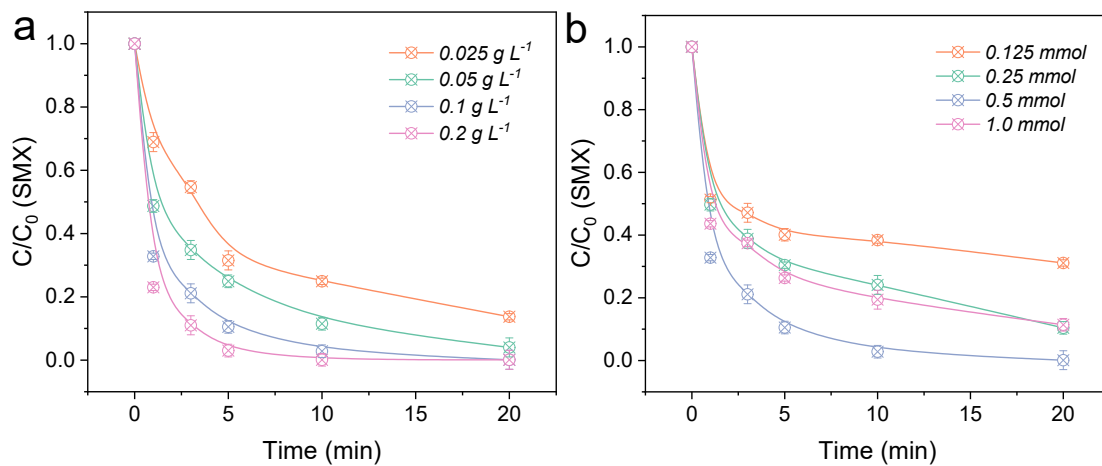

194

195 **Fig. S8 a-b** Influence of Fe-Mn/N-C dosage and PAA concentration.

196

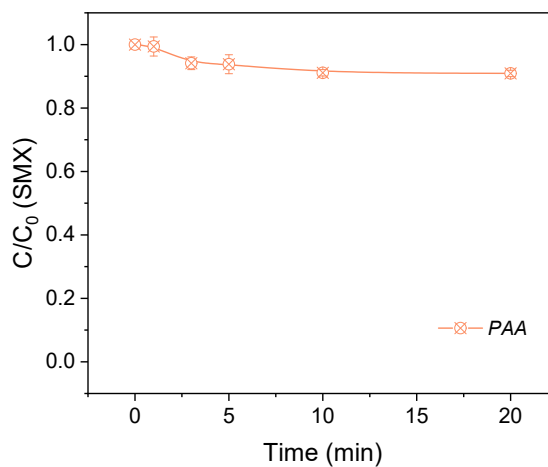

197

198 **Fig. S9** SMX removal efficiency in only-PAA system.

199

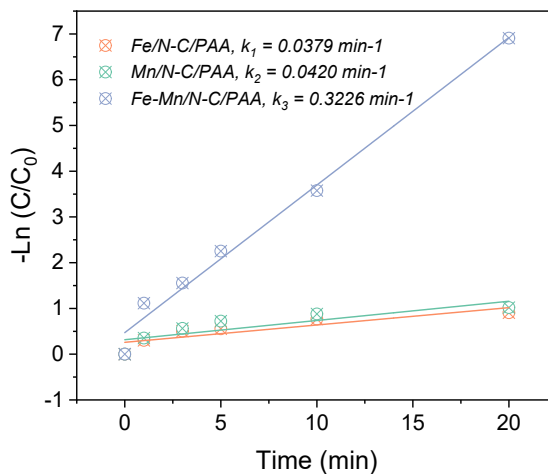

200

201 **Fig. S10** Kinetic curves in different reaction systems.

202

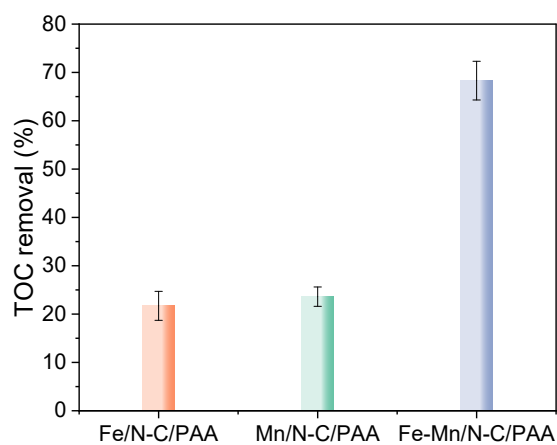

203

204 **Fig. S11** TOC removal of different reaction systems.

205

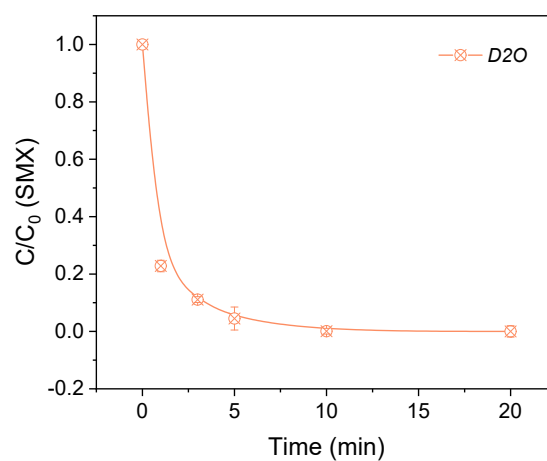

206

207 **Fig. S12** SMX degradation efficiency in Fe-Mn/N-C/PAA/D<sub>2</sub>O system.

208

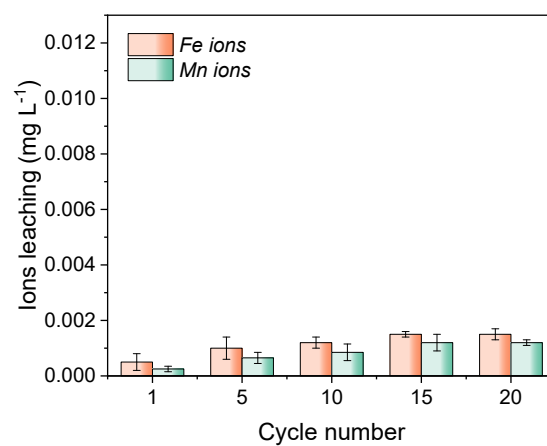

209

210 **Fig. S13** Metal leaching during cyclic operation of the Fe-Mn/N-C/PAA system.

211

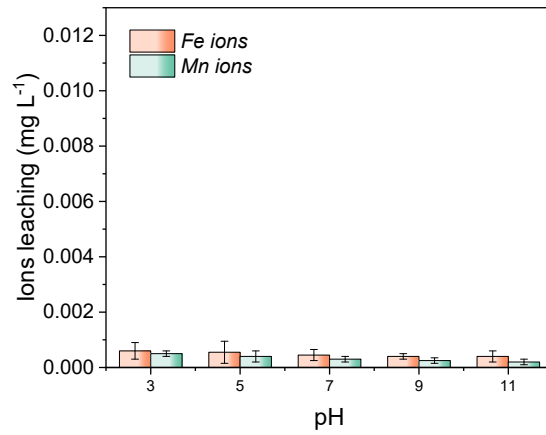

212

213 **Fig. S14** Metal leaching under different pH conditions in the Fe–Mn/N–C/PAA  
 214 system.

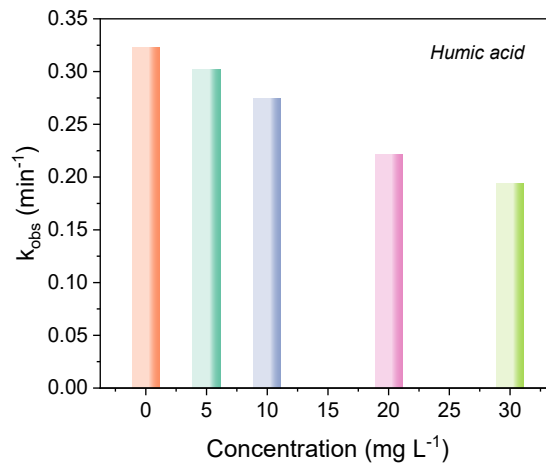

215

216 **Fig. S15** Effect of humic acid on SMX degradation in the Fe–Mn/N–C/PAA system.

217

218 **Tables caption**

219 **Table S1.** Porous properties of Fe/N-C, Mn/N-C, and Fe-Mn/N-C.

220 **Table S2.** EXAFS fitting parameters of Fe and Mn K-edge for Fe-Mn/N-C.

221 **Table S3.** Metal loading, kinetic constants, and normalized rate constants of different  
222 catalysts.

223 **Table S4.** Empirical formulae and m/z values for protonated molecular ions and  
224 characteristic fragments of the identified products.

225 **Table S5.** Physical and chemical properties of different pollutants.

226 **Table S6.** Calculated parameters of different organics.

227

228 **Table S1.** Porous properties of Fe/N–C, Mn/N–C, and Fe–Mn/N–C.

| Catalyst  | Specific surface<br>area <sup>a</sup> /m <sup>2</sup> g <sup>-1</sup> | Pore volume <sup>b</sup><br>/cm <sup>3</sup> g <sup>-1</sup> | Pore diameter <sup>c</sup><br>/nm |
|-----------|-----------------------------------------------------------------------|--------------------------------------------------------------|-----------------------------------|
| Fe/N–C    | 13.6                                                                  | 0.24                                                         | 4.3                               |
| Mn/N–C    | 15.8                                                                  | 0.27                                                         | 5.1                               |
| Fe–Mn/N–C | 20.7                                                                  | 0.17                                                         | 3.7                               |

229 <sup>a</sup>Specific surface area calculated from the nitrogen adsorption isotherm using the BET  
 230 method. <sup>b</sup>Pore volume obtained from BJH desorption cumulative volume of pores.  
 231 <sup>c</sup>Data obtained from BJH desorption average pore diameter.

232

233 **Table S2.** EXAFS fitting parameters of Fe and Mn K-edge for Fe–Mn/N–C.

| Sample             | Path  | N <sup>a</sup> | R/Å <sup>b</sup> | σ <sup>2</sup> /Å <sup>2c</sup> | R-factor |
|--------------------|-------|----------------|------------------|---------------------------------|----------|
| Fe in<br>Fe–Mn/N–C | Fe-Mn | 0.9 ± 0.2      | 2.43 ± 0.03      | 0.007                           | 0.006    |
| Mn in<br>Fe–Mn/N–C | Mn-Fe | 1.1 ± 0.2      | 2.43 ± 0.03      | 0.006                           | 0.008    |

234 <sup>a</sup>N is the coordination number. <sup>b</sup>R is the distance between absorber and backscatter  
 235 atoms, <sup>c</sup>σ<sup>2</sup> is the Debye-Waller factor, R-factor is residual factor.

236

237 **Table S3.** Metal loading, kinetic constants, and normalized rate constants of different  
 238 catalysts.

| Catalyst  | Metal loading<br>(wt%) | <i>C<sub>metal</sub></i><br>(10 <sup>-5</sup> mol L <sup>-1</sup> ) | <i>k<sub>obs</sub></i><br>(min <sup>-1</sup> ) | <i>k<sub>norm</sub></i><br>(L mol <sup>-1</sup> min <sup>-1</sup> ) |
|-----------|------------------------|---------------------------------------------------------------------|------------------------------------------------|---------------------------------------------------------------------|
| Fe/N-C    | 2.7                    | 4.82                                                                | 0.0379                                         | 786                                                                 |
| Mn/N-C    | 2.5                    | 4.55                                                                | 0.0420                                         | 923                                                                 |
| Fe-Mn/N-C | Fe: 2.7, Mn: 2.5       | 8.09                                                                | 0.3226                                         | 3988                                                                |

239

240

241 **Table S4.** Empirical formulae and m/z values for protonated molecular ions and  
 242 characteristic fragments of the identified products.

| Formula               | Intermediate product | ESI m/z | Structure                                                                             |
|-----------------------|----------------------|---------|---------------------------------------------------------------------------------------|
| $C_{10}H_{11}N_3O_3S$ | Sulfamethoxazole     | 254     | 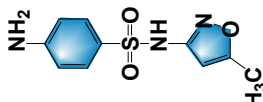   |
| $C_{10}H_9N_3O_5S$    | P1                   | 283     |    |
| $C_{10}H_9N_3O_6S$    | P2                   | 299     |    |
| $C_6H_7NO_3S$         | P3                   | 173     |   |
| $C_4H_5N_2O$          | P4                   | 98      |  |
| $C_4H_4N_2O_3$        | P5                   | 128     |  |
| $C_7H_6O_2$           | P6                   | 122     |  |
| $C_6H_7NO$            | P7                   | 109     |  |
| $C_4H_6N_2O_3S$       | P8                   | 162     |  |
| $C_{10}H_9N_3O_5S$    | P9                   | 283     |  |
| $C_{10}H_9N_3O_6S$    | P10                  | 299     |  |
| $C_{10}H_{10}N_2O_3S$ | P11                  | 238     |  |
| $C_{10}H_{11}N_3O_4S$ | P12                  | 269     |  |
| $C_{10}H_{13}N_3O_5S$ | P13                  | 287     |  |

$C_{11}H_8N_3O_{11}S$ 

P14

130

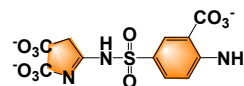

243

244

245 **Table S5.** Physical and chemical properties of different pollutants.

| Chemical Name       | Chemical structure | Molecular formula                                                          | Molecular weight (g mol <sup>-1</sup> ) |
|---------------------|--------------------|----------------------------------------------------------------------------|-----------------------------------------|
| Sulfadiazine        |                    | C <sub>10</sub> H <sub>10</sub> N <sub>4</sub> O <sub>2</sub> S            | 250.28                                  |
| Sulfamethoxazole    |                    | C <sub>10</sub> H <sub>11</sub> N <sub>3</sub> O <sub>3</sub> S            | 253.28                                  |
| Sulfamerazine       |                    | C <sub>11</sub> H <sub>12</sub> N <sub>4</sub> O <sub>2</sub> S            | 264.30                                  |
| Sulfathiazole       |                    | C <sub>9</sub> H <sub>9</sub> N <sub>3</sub> O <sub>2</sub> S <sub>2</sub> | 255.01                                  |
| Sulfamethazine      |                    | C <sub>12</sub> H <sub>14</sub> N <sub>4</sub> O <sub>2</sub> S            | 278.33                                  |
| Sulfanilylacetamide |                    | C <sub>8</sub> H <sub>10</sub> N <sub>2</sub> SO <sub>3</sub>              | 214.24                                  |
| 4-Chlorophenol      |                    | C <sub>6</sub> H <sub>5</sub> ClO                                          | 128.56                                  |
| Bisphenol A         |                    | C <sub>15</sub> H <sub>16</sub> O <sub>2</sub>                             | 228.29                                  |

246

247

248 **Table S6.** Calculated parameters of different organics.

| Chemical Name       | HOMO eV | LUMO eV | $\Delta E (E_{\text{HOMO}} - E_{\text{LUMO}})$ |
|---------------------|---------|---------|------------------------------------------------|
| Sulfadiazine        |         |         |                                                |
| SDZ                 | -6.25   | -1.61   | -4.64                                          |
| Sulfamethoxazole    |         |         |                                                |
| SMX                 | -6.27   | -1.19   | -5.08                                          |
| Sulfamerazine       |         |         |                                                |
| SD1                 | -6.25   | -1.51   | -4.74                                          |
| Sulfathiazole       |         |         |                                                |
| STZ                 | -6.26   | -1.27   | -4.56                                          |
| Sulfamethazine      |         |         |                                                |
| SD2                 | -6.24   | -1.40   | -4.84                                          |
| Sulfanilylacetamide |         |         |                                                |
| SMD                 | -6.27   | -1.74   | -4.53                                          |
| 4-Chlorophenol      |         |         |                                                |
| 4-CP                | -6.33   | -1.07   | -5.26                                          |
| Bisphenol A         |         |         |                                                |
| BPA                 | -6.03   | -0.60   | -5.43                                          |

249

250
